# Supplementary material for: KRASG12C Can Either Promote or Impair Cap-Dependent Translation in Two Different Lung Adenocarcinoma Cell Lines
Source: MDPI journal article supplement (doi:10.3390/ijms22042222), 2021-02-23
Supplement: s1 [file s1]

# Supplementary Materials: KRAS<sup>G12C</sup> Can Either Promote or Impair Cap-Dependent Translation in Two Different Lung Adenocarcinoma Cell Lines

George Kyriakopoulos, Vicky Katopodi, Ilias Skeparnias, Eleni G. Kaliatsi, Katerina Grafanaki and Constantinos Stathopoulos

## Supplementary Figures

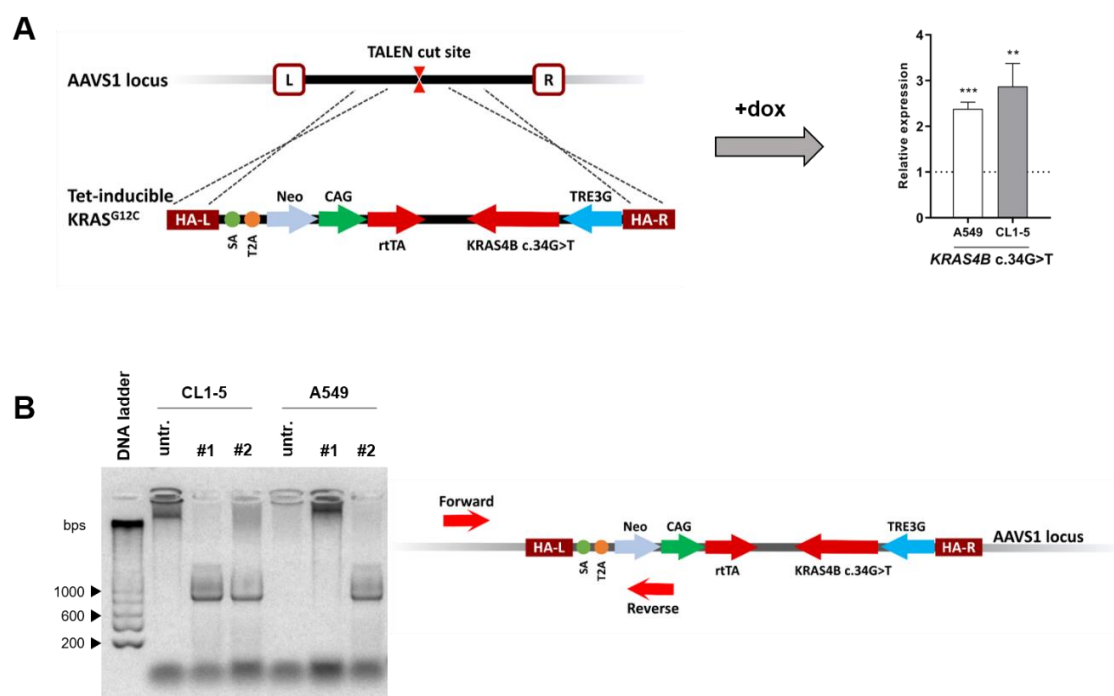

**Figure S1.** Generation of A549 and CL1-5 KRAS<sup>G12C</sup> Tet-inducible stable cell lines. **(A)** TALE Nucleases Left and Right are designed to induce a double-strand break at a specific point on the AAVS1 locus of the human genome. Homologous recombination with the homology arms of the construct containing the TRE3G promoter and the KRAS4B c.34G>T gene sequence were incorporated into the specific locus. After clonal selection, addition of doxycycline in the chosen clones' medium led to almost 3-fold upregulation of KRAS4B c.34G>T gene. The expression levels are shown as relative expression compared to the levels of endogenous KRAS gene of the control cells (dotted line) using the  $2^{-\Delta\Delta Ct}$  method. Data are compared by using unpaired Student's t-test and are presented as means $\pm$ SD of biological triplicates. *P*-values are indicated with \**p* < 0.05; \*\**p* < 0.01; \*\*\**p* < 0.001. **(B)** Confirmation of the selected clonal cell cultures from A549 and CL1-5 cells by PCR using a set of primers that amplifies the expected 1033bps PCR product only if the construct is integrated at the AAVS1 locus. In CL1-5 cells both clones were positive and clone #1 was selected and in A549 cells clone #2 was positive.

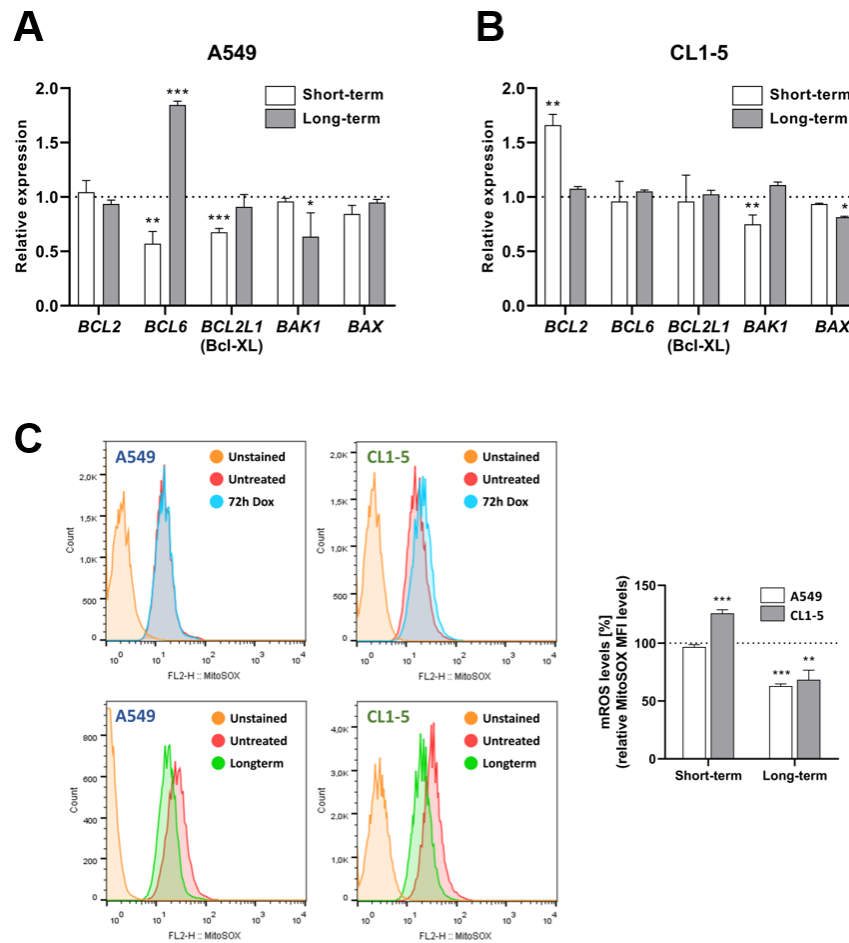

**Figure S2.** Expression levels of BCL2 family members and mitochondrial ROS production. (**A and B**) The mRNA levels of key members of the BCL2 family were measured by RT-qPCR after short-term (72 h) and long-term (>1 month) induction of KRAS<sup>G12C</sup> in A549 and CL1-5 cells. All levels are shown as relative expression compared to the control (dotted line) using the  $2^{-\Delta\Delta C_t}$  method. Data are compared by using unpaired Student's t-test and are presented as means $\pm$ SD of biological triplicates. P-values are indicated with \* $p < 0.05$ ; \*\* $p < 0.01$ ; \*\*\* $p < 0.001$ . (**C**) Mitochondrial ROS production were measured by MitoSOX staining and flow cytometry after short-term (72 h) and long-term (>1 month) induction of KRAS<sup>G12C</sup> in A549 and CL1-5 cells. ROS levels are shown as relative (%) MFI levels upon MitoSOX staining compared to the control (dotted line). Data are compared by using unpaired Student's t-test and are presented as means $\pm$ SD of biological triplicates. P-values are indicated with \* $p < 0.05$ ; \*\* $p < 0.01$ ; \*\*\* $p < 0.001$ .

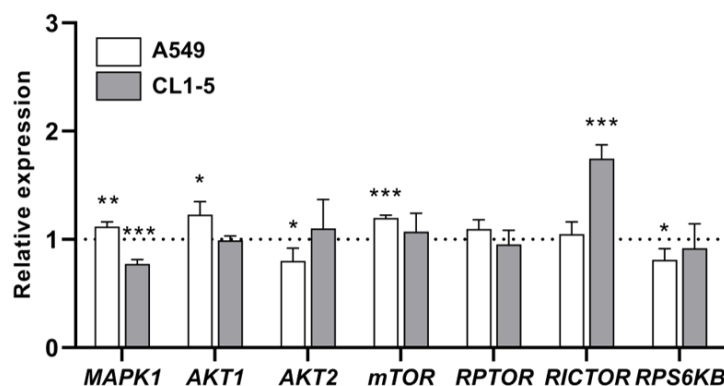

**Figure S3.** mRNA levels of key components of MAPK and PI3K/AKT/mTOR signaling pathways. Expression levels of genes involved in MAPK and PI3K/AKT/mTOR signaling pathways after induction of KRAS<sup>G12C</sup> in A549 and CL1-5 cells, as identified by RT-qPCR. All levels are shown as relative expression compared to the control (dotted line) using the  $2^{-\Delta\Delta C_t}$  method. Data are compared by using unpaired Student's t-test and are presented as means $\pm$ SD of biological triplicates. *P*-values are indicated with \**p* < 0.05; \*\**p* < 0.01; \*\*\**p* < 0.001.

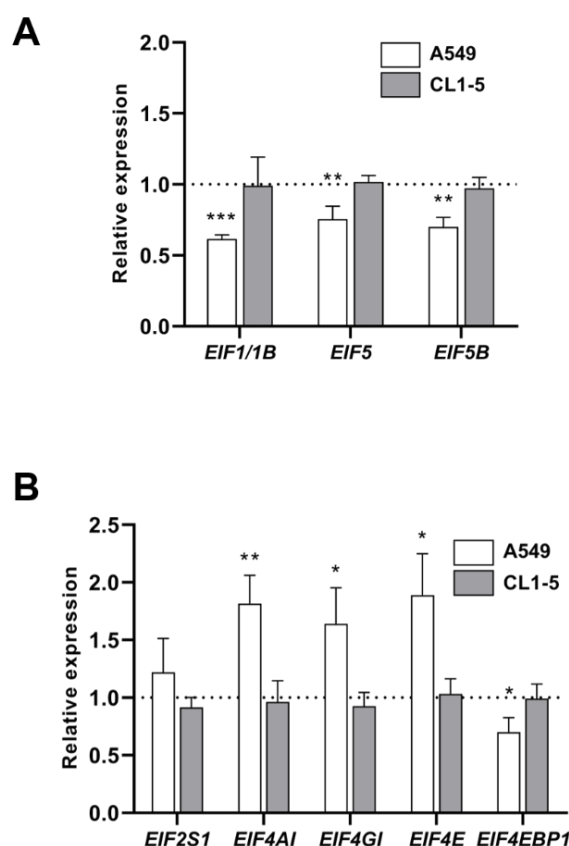

**Figure S4.** Expression profile of genes involved in the fidelity of start codon selection and cap-dependent translation. (A) The mRNA levels of key components involved in the fidelity of mRNA scanning were measured by RT-qPCR after induction of KRAS<sup>G12C</sup> in A549 and CL1-5 cells. (B) The expression profile of *EIF2S1* gene and the genes coding for members of the eIF4F complex was identified by RT-qPCR after induction of KRAS<sup>G12C</sup> in A549 and CL1-5 cells. All levels are shown as relative

expression compared to the control (dotted line) using the  $2^{-\Delta\Delta C_t}$  method. Data are compared by using unpaired Student's *t*-test and are presented as means $\pm$ SD of biological triplicates. *P*-values are indicated with \**p* < 0.05; \*\**p* < 0.01; \*\*\**p* < 0.001.

## Supplementary Tables

**Table 1.** List of antibodies used for Western blot analysis.

| Antibody                    | RRID        | Catalog No. | Clone      | Company             |
|-----------------------------|-------------|-------------|------------|---------------------|
| $\beta$ -Actin              | AB_330288   | 4967        | polyclonal | Cell Signaling      |
| phospho-ERK                 | AB_627545   | sc-7383     | E-4        | Santa Cruz Biotech. |
| ERK 1/2                     | AB_2141283  | sc-135900   | MK1        | Santa Cruz Biotech. |
| phospho-AKT (S473)          | AB_329825   | 9271        | polyclonal | Cell Signaling      |
| phospho-mTOR (S2448)        | AB_10691552 | 5536        | D9C2       | Cell Signaling      |
| mTOR                        | AB_2105622  | 2983        | 7C10       | Cell Signaling      |
| RAPTOR                      | AB_2130791  | sc-81537    | 10E10      | Santa Cruz Biotech. |
| RICTOR                      | AB_10611167 | sc-271081   | H-11       | Santa Cruz Biotech. |
| phospho-p70-S6K (T389)      | AB_2269803  | 9234        | 108D2      | Cell Signaling      |
| p70-S6K                     | AB_331676   | 9202        | polyclonal | Cell Signaling      |
| I $\kappa$ B- $\alpha$      | AB_627772   | sc-1643     | H-4        | Santa Cruz Biotech. |
| eIF1/1B                     | N/A         | sc-390122   | B-2        | Santa Cruz Biotech. |
| phospho-eIF2 $\alpha$ (S51) | AB_330951   | 9721        | polyclonal | Cell Signaling      |
| eIF2 $\alpha$               | AB_2230924  | 9722        | polyclonal | Cell Signaling      |
| eIF5                        | AB_627507   | sc-28309    | E-10       | Santa Cruz Biotech. |
| eIF5B                       | N/A         | sc-393564   | D-9        | Santa Cruz Biotech. |
| phospho-eIF4E (S209)        | AB_331677   | 9741        | polyclonal | Cell Signaling      |
| eIF4E                       | AB_2097675  | 2067        | C46H6      | Cell Signaling      |
| phospho-4E-BP1 (S65)        | AB_823413   | 9456        | 174A9      | Cell Signaling      |
| 4E-BP1                      | AB_2097841  | 9644        | 53H11      | Cell Signaling      |
| c-MYC                       | AB_627266   | sc-47694    | 9E11       | Santa Cruz Biotech. |
| anti-puromycin              | AB_2566826  | MABE343     | 12D10      | Millipore           |

**Table S2.** List of primers used for gene expression analysis.

| Gene          | Forward                  | Reverse                  |
|---------------|--------------------------|--------------------------|
| ACTB          | AGCGAGCATCCCCAAAGTT      | GGGCACGAAGGCTCATCATT     |
| BAK           | TGCATTTGGCTGAATCAAGAAGTT | AGTGGGAGAAGGACTATCAACACC |
| BAX- $\alpha$ | TCAGGATGCGTCCACCAAGAAGC  | TGAGCACTCCCGCCACAAAGATG  |
| BCL2          | GCACTTCTCCCGCCGCTACCGC   | AGGCCGCTGCTGGGGCCGAC     |
| BCL6          | CATGCAGAGATGTGCTCCACA    | TCAGAGAAGCGGCAGTCACACT   |
| BCL-XL        | GGAAAGCGTAGACAAGGAGATGC  | GGTGGGAGGGTAGAGTGGATGGT  |
| KRAS4B        | CAAGAGCGCCTTGACGATACA    | CCAAGAGACAGGTTTCTCCATC   |
| PTEN          | GTGGAGTTTACCGGCAGCAT     | CTGGCAGGTAGAAGGCAACT     |
| c-MYC         | TCCATGAGGAGACACCGCCCA    | TGGGGCTGGTGCATTTTCGGT    |
| MAPK1         | CGCCGAAGCACCATTCAAG      | AGAACACCGATGTCTGAGCA     |
| AKT1          | ATGCAGCATCGTTCTTTGC      | TGATCATCTGGGCCGTGAAC     |
| AKT2          | ACCACAGTCATCGAGAGGACC    | GGAGCCACACTTGTAGTCCA     |
| mTOR          | AGCTGCCAAGTGCCGAGCAT     | AGCAGCCATCCGGGCCATCTT    |
| RPTOR         | ATTCCCACCGCTCACTCATC     | TTGACGCTCACACTCACGAT     |
| RICTOR        | TTTTTCGGGGATTCTGGATGC    | GACAGCAAATGGGAAACCTCA    |
| RPS6KB        | TTGGTCAGGCAGTCAACACT     | TGCAGGACACGTGGAGTAAC     |
| EIF1/1B       | TGTCCAAGGGATCGCTGATG     | TTCAGTGAGCCACAAGCACT     |
| EIF2S1        | AATAGGCGCTTGACCCAC       | TGTTCTCTCCAGGGTTGTCC     |
| EIF5          | GCTCCGTATCCAGCAGTGAG     | CATTTCGACGCCTTTGAGCTT    |
| EIF5B         | GGGTGTTGAAGTGCCATCAAA    | CCAATCATCCAATCCAGCATCC   |
| EIF4AI        | TATGACCTTCCCACCAACAGG    | CCTCAGATGAGGTCAGCAACA    |

|                 |                         |                          |
|-----------------|-------------------------|--------------------------|
| <i>EIF4GI</i>   | TTTGAGACTCCCCTCCGAGT    | CCTCGTCATACAGTGCGTCA     |
| <i>EIF4E</i>    | AGGACTGAAACCACCCTCCAGCA | TCGGGGGATTAGGAGTAGGGGTGG |
| <i>EIF4EBP1</i> | TCCTTGTGCCTCCACTGATG    | CTAAGGAAGGGGTGTTGCG      |

**Table S3.** List of primers used for miRNAs expression analysis.

| Primers         | Sequence                                       |
|-----------------|------------------------------------------------|
| oligodT adapter | GCGAGCACAGAATTAATACGACTCACTATAGGTTTTTTTTTTTTVN |
| Outer primer    | GCGAGCACAGAATTAATACGACT                        |
| miR-103         | AGCAGCATTGTACAGGGCTATGA                        |
| miR-26a-5p      | TTCAAGTAATCCAGGATAGGCT                         |
| miR-26b-5p      | TTCAAGTAATTCAGGATAGGT                          |
| miR-92a-3p      | TATTGCACTTGTCCCGGCCT                           |
| hsa-let-7a-5p   | TGAGGTAGTAGGTTGTATAGTT                         |
| hsa-let-7b-5p   | TGAGGTAGTAGGTTGTGTGGTT                         |
| hsa-let-7c-5p   | TGAGGTAGTAGGTTGTATGGTT                         |
| hsa-let-7d-5p   | AGAGGTAGTAGGTTGCATAGTT                         |
| hsa-let-7e-5p   | TGAGGTAGGAGGTTGTATAGTT                         |
| hsa-let-7f-5p   | TGAGGTAGTAGATTGTATAGTT                         |
| hsa-let-7g-5p   | TGAGGTAGTAGTTTGTACAGTT                         |
| hsa-let-7i-5p   | TGAGGTAGTAGTTTGTGCTGTT                         |
